# Supplementary material for: Consequences of Oviposition Site Choice for Geckos in Changing Environments
Source: MDPI journal article supplement (doi:10.3390/biology11091281), 2022-08-29
Supplement: s1 [file s1]

## Supplementary Information

### *Egg incubation treatments*

Females laid clutches of two eggs in the lab. Shortly after eggs were laid, we placed eggs singly inside 100 mL glass jars filled with moist vermiculite (water potential of 200 KPa). We sealed each jar with plastic food wrap to prevent the eggs from desiccating and randomly allocated one egg from each clutch produced by each female to each of two programmable incubators (Panasonic MIR 154, 10 step functions). We programmed incubators to mimic fluctuating temperatures experienced during summer inside current sun-exposed “warm” (mean = 25.4 °C; range = 16.5–35.5 °C) and shaded “cold” (mean = 23.3 °C; range = 17.5–30.5 °C) nest sites. Incubators had glass doors, and lights in the room were programmed to come on at sunrise, and go off at sunset each day. Temperatures were programmed to cycle on a daily basis, but minima and maxima increased as summer progressed, and there were hotter periods to simulate the temperatures that can occur during heatwaves (Figure S1). We recorded the temperature inside each incubator by placing four miniature data loggers (Thermochron DS1922L-F5#, accuracy of  $\pm 0.5$  °C) inside 100 ml glass jars which were filled with egg incubation media and sealed with cling wrap. The glass jars containing the data loggers were positioned at the front and rear of the top and bottom shelves of each incubator. Due to an electrical fault, the cold incubator stopped functioning for 3 days, so temperatures drifted to ambient at that time until the fault was fixed (Figure S1a).

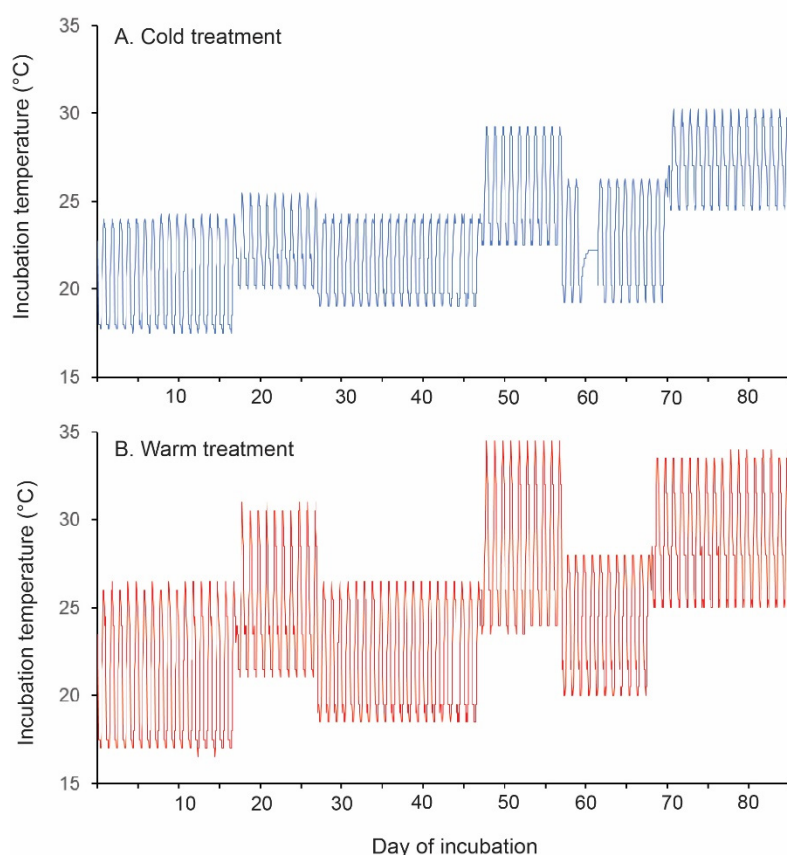

**Figure S1.** Temperature profiles of the cold (a) and warm (b) incubation treatments.

**Table S1.** Morphology of hatchlings from the egg incubation experiment. The term ‘DT’ indicates that a hatchling dropped its tail, and so no tail length was recorded for that individual.

| Location | Incubation treatment | Snout-vent length (mm) | Tail length (mm) | Mass (g) |
|----------|----------------------|------------------------|------------------|----------|
| Dharawal | Cold                 | 25                     | 22               | 0.48     |
| Dharawal | Cold                 | 27                     | 19               | 0.47     |
| Dharawal | Cold                 | 28                     | 22               | 0.41     |
| Dharawal | Cold                 | 26                     | 24               | 0.48     |
| Dharawal | Cold                 | 26                     | 22               | 0.43     |
| Dharawal | Cold                 | 24                     | 21               | 0.31     |
| Dharawal | Cold                 | 30                     | 23               | 0.52     |
| Dharawal | Cold                 | 29                     | 23               | 0.56     |
| Dharawal | Cold                 | 27                     | 25               | 0.67     |
| Dharawal | Cold                 | 26                     | 22               | 0.42     |
| Dharawal | Cold                 | 28                     | 23               | 0.46     |
| Dharawal | Cold                 | 26                     | 28               | 0.52     |
| Dharawal | Cold                 | 26                     | DT               | 0.48     |
| Dharawal | Cold                 | 28                     | 23               | 0.42     |
| Dharawal | Cold                 | 23                     | 19               | 0.46     |
| Dharawal | Cold                 | 27                     | 23               | 0.41     |
| Dharawal | Cold                 | 22                     | 21               | 0.50     |
| Dharawal | Cold                 | 26                     | 27               | 0.54     |
| Dharawal | Cold                 | 25                     | 23               | 0.49     |
| Dharawal | Cold                 | 29                     | 23               | 0.47     |
| Dharawal | Cold                 | 26                     | 24               | 0.50     |
| Dharawal | Cold                 | 26                     | 19               | 0.49     |
| Dharawal | Warm                 | 26                     | 10               | 0.46     |
| Dharawal | Warm                 | 26                     | 22               | 0.46     |
| Dharawal | Warm                 | 25                     | 22               | 0.48     |
| Dharawal | Warm                 | 25                     | 24               | 0.50     |
| Dharawal | Warm                 | 26                     | 20               | 0.41     |
| Dharawal | Warm                 | 26                     | 20               | 0.46     |
| Dharawal | Warm                 | 30                     | 26               | 0.54     |
| Dharawal | Warm                 | 27                     | 28               | 0.50     |
| Dharawal | Warm                 | 26                     | 22               | 0.39     |
| Dharawal | Warm                 | 27                     | 24               | 0.61     |
| Dharawal | Warm                 | 27                     | 26               | 0.46     |
| Dharawal | Warm                 | 28                     | 24               | 0.47     |
| Dharawal | Warm                 | 25                     | 24               | 0.48     |
| Dharawal | Warm                 | 27                     | 23               | 0.48     |
| Dharawal | Warm                 | 22                     | 20               | 0.33     |
| Dharawal | Warm                 | 22                     | 17               | 0.36     |
| Nowra    | Cold                 | 27                     | 20               | 0.44     |
| Nowra    | Cold                 | 28                     | 25               | 0.54     |
| Nowra    | Cold                 | 30                     | 24               | 0.44     |

|       |      |    |    |      |
|-------|------|----|----|------|
| Nowra | Cold | 27 | 24 | 0.50 |
| Nowra | Cold | 29 | 27 | 0.56 |
| Nowra | Cold | 25 | 22 | 0.56 |
| Nowra | Cold | 28 | 24 | 0.55 |
| Nowra | Cold | 25 | 23 | 0.5  |
| Nowra | Cold | 28 | 16 | 0.52 |
| Nowra | Cold | 26 | DT | 0.39 |
| Nowra | Cold | 29 | 25 | 0.4  |
| Nowra | Cold | 29 | 26 | 0.44 |
| Nowra | Cold | 27 | 21 | 0.47 |
| Nowra | Cold | 28 | 25 | 0.37 |
| Nowra | Cold | 29 | 25 | 0.51 |
| Nowra | Cold | 27 | 24 | 0.46 |
| Nowra | Cold | 25 | 26 | 0.48 |
| Nowra | Cold | 29 | 28 | 0.53 |
| Nowra | Cold | 26 | 10 | 0.51 |
| Nowra | Cold | 28 | 22 | 0.52 |
| Nowra | Cold | 29 | 25 | 0.48 |
| Nowra | Cold | 26 | 24 | 0.49 |
| Nowra | Cold | 30 | 23 | 0.51 |
| Nowra | Cold | 28 | 23 | 0.50 |
| Nowra | Cold | 24 | 23 | 0.42 |
| Nowra | Cold | 26 | 23 | 0.58 |
| Nowra | Cold | 31 | 24 | 0.40 |
| Nowra | Cold | 29 | 26 | 0.41 |
| Nowra | Cold | 26 | 24 | 0.52 |
| Nowra | Cold | 27 | 21 | 0.54 |
| Nowra | Cold | 28 | 24 | 0.59 |
| Nowra | Cold | 26 | 22 | 0.41 |
| Nowra | Cold | 31 | 29 | 0.52 |
| Nowra | Cold | 24 | 21 | 0.39 |
| Nowra | Warm | 28 | 21 | 0.48 |
| Nowra | Warm | 28 | 22 | 0.54 |
| Nowra | Warm | 25 | 12 | 0.46 |
| Nowra | Warm | 26 | 21 | 0.56 |
| Nowra | Warm | 24 | 9  | 0.45 |
| Nowra | Warm | 25 | 21 | 0.58 |
| Nowra | Warm | 25 | 20 | 0.43 |
| Nowra | Warm | 26 | 23 | 0.47 |
| Nowra | Warm | 26 | 21 | 0.49 |
| Nowra | Warm | 26 | 25 | 0.51 |
| Nowra | Warm | 26 | 22 | 0.49 |
| Nowra | Warm | 28 | 25 | 0.45 |
| Nowra | Warm | 25 | 20 | 0.39 |
| Nowra | Warm | 22 | 16 | 0.37 |
| Nowra | Warm | 24 | 20 | 0.43 |
| Nowra | Warm | 23 | 10 | 0.41 |

|       |      |    |    |      |
|-------|------|----|----|------|
| Nowra | Warm | 28 | 23 | 0.42 |
| Nowra | Warm | 24 | DT | 0.41 |
| Nowra | Warm | 24 | 22 | 0.43 |
| Nowra | Warm | 24 | 20 | 0.48 |
| Nowra | Warm | 26 | 20 | 0.44 |
| Nowra | Warm | 23 | 21 | 0.38 |
| Nowra | Warm | 26 | 22 | 0.39 |
| Nowra | Warm | 25 | 27 | 0.46 |
| Nowra | Warm | 27 | 26 | 0.52 |
| Nowra | Warm | 26 | 24 | 0.48 |
| Nowra | Warm | 26 | 21 | 0.43 |
| Nowra | Warm | 26 | 21 | 0.46 |
| Nowra | Warm | 27 | 23 | 0.44 |
| Nowra | Warm | 26 | 21 | 0.49 |
| Nowra | Warm | 25 | 20 | 0.39 |
| Nowra | Warm | 27 | 25 | 0.51 |
| Nowra | Warm | 27 | 21 | 0.46 |
| Nowra | Warm | 28 | 25 | 0.50 |
| Nowra | Warm | 29 | 28 | 0.51 |
| Nowra | Warm | 25 | 22 | 0.36 |
| Nowra | Warm | 26 | 22 | 0.42 |

**Table S2.** Mark recapture data for geckos released at a site in Dharawal National Park. Each row indicates the mark-recapture data for an individual gecko. The first eight characters code for the mark-recapture data, with '1' indicating that the individual was captured, and '0' indicating that the individual was not captured. After the space, the next two characters designate the incubation treatment, with '1 0' coding for the cold incubation treatment and '0 1' coding for the warm incubation treatment. The covariates for snout-vent length, tail length, and mass appear after the coding for incubation treatment.

|                        |
|------------------------|
| 10010000 1 0 24 19 31; |
| 11111111 1 0 25 23 55; |
| 11101110 1 0 25 22 49; |
| 10101101 1 0 25 22 48; |
| 10000000 1 0 23 21 48; |
| 10111110 1 0 22 20 27; |
| 10100000 1 0 26 20 49; |
| 11111000 1 0 30 25 47; |
| 10000000 1 0 26 21 50; |
| 11010000 1 0 23 19 42; |
| 11110011 1 0 24 23 49; |
| 11011110 1 0 25 21 40; |
| 11011111 1 0 25 22 39; |

|                        |
|------------------------|
| 10000000 1 0 21 19 19; |
| 10000000 1 0 27 24 46; |
| 10110000 1 0 23 22 39; |
| 10100000 1 0 30 28 47; |
| 10010000 1 0 25 19 50; |
| 10000001 1 0 21 15 48; |
| 10001000 1 0 22 21 36; |
| 10000100 1 0 23 20 48; |
| 10100000 0 1 25 23 49; |
| 10010000 0 1 24 21 57; |
| 11011110 0 1 24 17 42; |
| 10000000 0 1 24 18 68; |
| 10000000 0 1 23 19 45; |
| 10111111 0 1 22 15 45; |
| 10000000 0 1 27 21 44; |
| 11111111 0 1 26 19 58; |
| 10111101 0 1 22 21 30; |
| 10000001 0 1 20 16 32; |
| 10001111 0 1 27 22 57; |
| 10000000 0 1 25 21 52; |
| 10000000 0 1 27 22 54; |
| 11000100 0 1 26 19 56; |

**Table S3.** Mark recapture data for geckos released at a site near Nowra. Each row indicates the mark-recapture data for an individual gecko. The first eight characters code for the mark-recapture data, with '1' indicating that the individual was captured, and '0' indicating that the individual was not captured. After the space, the next two characters designate the incubation treatment, with '0 1' coding for the cold incubation treatment and '1 0' coding for the warm incubation treatment. The covariates for snout-vent length, tail length, and mass appear after the coding for incubation treatment.

|                       |
|-----------------------|
| 1000000 0 1 27 24 48; |
| 1000000 0 1 26 21 50; |
| 1000000 0 1 29 25 49; |
| 1000100 0 1 25 19 45; |
| 1001110 0 1 25 19 39; |
| 1001010 0 1 24 22 50; |
| 1000000 0 1 25 23 47; |
| 1000000 0 1 25 20 48; |
| 1000000 0 1 25 22 45; |
| 1001000 0 1 27 25 48; |
| 1000000 0 1 26 22 49; |
| 1000000 0 1 25 23 43; |
| 1000000 0 1 25 22 39; |

|                       |
|-----------------------|
| 1000000 0 1 27 24 56; |
| 1000000 0 1 27 22 49; |
| 1000000 0 1 25 18 41; |
| 1000000 0 1 26 23 52; |
| 1000000 0 1 24 21 52; |
| 1000000 0 1 27 23 48; |
| 1000000 0 1 23 15 40; |
| 1000000 0 1 24 18 44; |
| 1000000 0 1 25 23 62; |
| 1001111 0 1 25 19 45; |
| 1100000 0 1 27 23 34; |
| 1000000 0 1 23 17 34; |
| 1100000 0 1 25 16 38; |
| 1000000 0 1 23 16 34; |
| 1000010 0 1 27 22 33; |
| 1000000 0 1 23 21 48; |
| 1010000 0 1 24 19 49; |
| 1000000 0 1 24 23 46; |
| 1000000 0 1 25 21 47; |
| 1000000 0 1 25 22 50; |
| 1000000 0 1 28 21 46; |
| 1110010 1 0 22 22 45; |
| 1110001 1 0 24 9 45;  |
| 1110000 1 0 26 21 46; |
| 1111111 1 0 24 25 41; |
| 1000000 1 0 27 21 51; |
| 1100000 1 0 22 9 36;  |
| 1000000 1 0 26 22 50; |
| 1000000 1 0 25 23 40; |
| 1000000 1 0 28 21 47; |
| 1000000 1 0 24 18 33; |
| 1000000 1 0 27 23 53; |
| 1000000 1 0 24 22 52; |
| 1000000 1 0 25 21 49; |
| 1000000 1 0 25 19 57; |
| 1000000 1 0 23 22 58; |
| 1110001 1 0 24 22 32; |
| 1001000 1 0 22 19 42; |
| 1000000 1 0 23 9 41;  |
| 1000000 1 0 26 21 45; |
| 1000000 1 0 29 24 46; |
| 1000000 1 0 28 24 60; |
| 1000000 1 0 24 19 46; |
| 1000000 1 0 25 19 42; |
| 1010111 1 0 27 23 51; |

|                       |
|-----------------------|
| 1000000 1 0 26 22 52; |
| 1110001 1 0 24 19 48; |
| 1000000 1 0 22 19 47; |
| 1000000 1 0 26 24 51; |
| 1000000 1 0 24 19 41; |
| 1000000 1 0 26 23 39; |
| 1000000 1 0 25 21 58; |
| 1000000 1 0 24 20 48; |
| 1000000 1 0 25 16 30; |
| 1000000 1 0 26 21 49; |
| 1000000 1 0 27 16 43; |
| 1000000 1 0 24 21 39; |
| 1100000 1 0 23 19 46; |
